# Supplementary material
Source: Springer Nature journal article supplement (https://www.springermedizin.de/resource/supplementary/13063_2013_1548_MOESM4_ESM.pdf/9620012)
Supplement: MOESM4 [file 9620012]

Eligible schools for randomisation  
N = 60

Randomisation

| Intervention Schools N = 30 |    |
|-----------------------------|----|
| Baseline Measure            | Np |
| Total                       |    |
| Accelerometer               |    |
| Diet                        |    |
| Weight & Height             |    |
| Waist                       |    |
| Screen time                 |    |

| Control Schools N = 30 |    |
|------------------------|----|
| Baseline Measure       | Np |
| Total                  |    |
| Accelerometer          |    |
| Diet                   |    |
| Weight & Height        |    |
| Waist                  |    |
| Screen time            |    |

| Intervention Schools N = 30 |        |
|-----------------------------|--------|
| Follow-up measure           | Np (%) |
| Total                       |        |
| Accelerometer               |        |
| Diet                        |        |
| Weight & Height             |        |
| Waist                       |        |
| Screen time                 |        |

| Control Schools N = 30 |        |
|------------------------|--------|
| Follow-up measure      | Np (%) |
| Total                  |        |
| Accelerometer          |        |
| Diet                   |        |
| Weight & Height        |        |
| Waist                  |        |
| Screen time            |        |
